# Supplementary material for: Biallelic Mutations in NBAS Cause Recurrent Acute Liver Failure with Onset in Infancy
Source: PubMed Central journal article supplement (PMC4572578; doi:10.1016/j.ajhg.2015.05.009), 2015-07-02
Supplement: mmc1.pdf [file mmc1.pdf]

The American Journal of Human Genetics

Supplemental Data

## **Biallelic Mutations in *NBAS* Cause**

## **Recurrent Acute Liver Failure with Onset in Infancy**

**Tobias B. Haack, Christian Staufner, Marlies G. Köpke, Beate K. Straub, Stefan Kölker, Christian Thiel, Peter Freisinger, Ivo Baric, Patrick J. McKiernan, Nicola Dikow, Inga Harting, Flemming Beisse, Peter Burgard, Urania Kotzaeridou, Joachim Kühr, Urban Himbert, Robert W. Taylor, Felix Distelmaier, Jerry Vockley, Lina Ghaloul-Gonzalez, Johannes Zschocke, Laura S. Kremer, Elisabeth Graf, Thomas Schwarzmayr, Daniel M. Bader, Julien Gagneur, Thomas Wieland, Caterina Terrile, Tim M. Strom, Thomas Meitinger, Georg F. Hoffmann, Holger Prokisch**

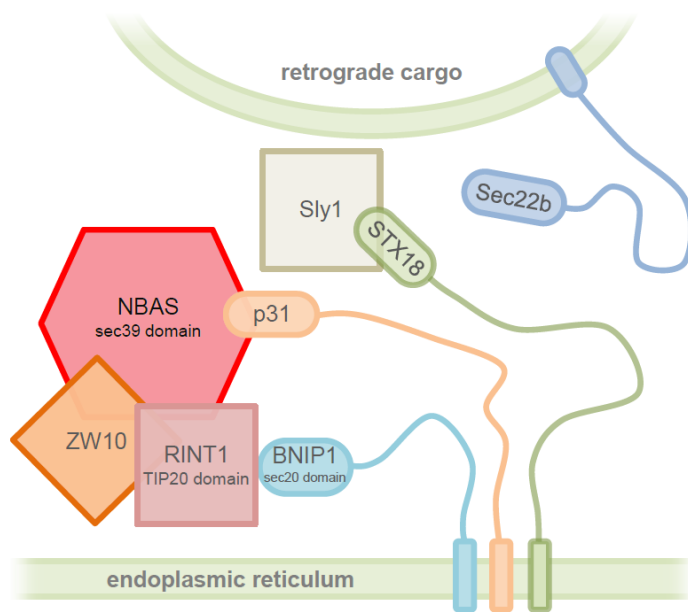

**Figure S1. Proposed Function of NBAS**

Schematic representation of the predicted NBAS function in the t-SNARE Syntaxin 18 complex.

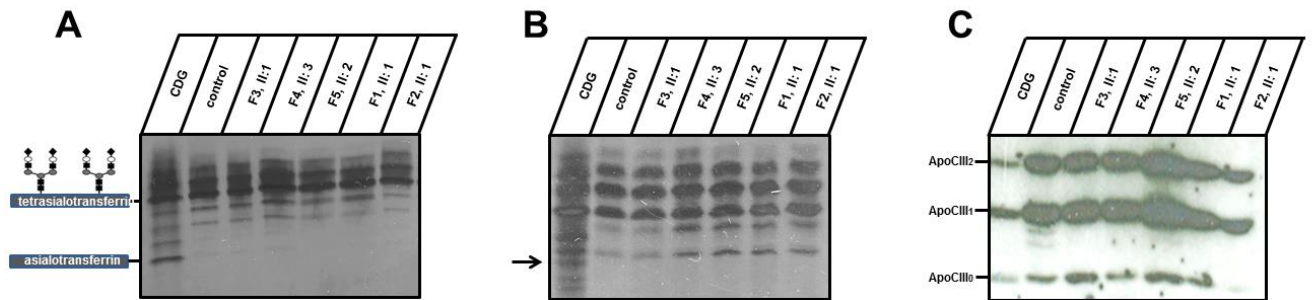

**Figure S2. Isoelectric Focusing of Transferrin, Alpha-1-antitrypsin, and Apolipoprotein CIII**

Sera of a control, a CDG patient and the individuals with *NBAS* variants were analyzed by isoelectric focusing (IEF), followed by in gel immunodetection.

(A) 'Tetrasialo' and 'asialo' indicate transferrin forms with four or no sialic acid residues on transferrin. A control-like IEF pattern was obtained for all individuals with *NBAS* variants. Filled square, N-acetylglucosamine; grey circle, mannose; open circle, galactose; filled diamond, sialic acid.

(B) For alpha-1-antitrypsin the position of the first additional abnormal cathodal band is indicated by an 'arrow'. This band and all bands below are abnormal and indicate a N-glycosylation deficiency in case of the CDG patient only.

(C) To further investigate, whether the variants in *NBAS* have an impact on the biosynthesis of core 1 mucin type O-glycans, IEF of Apolipoprotein CIII (ApoCIII) was performed. ApoCIII<sub>2</sub>, ApoCIII<sub>1</sub> and ApoCIII<sub>0</sub> indicate the variability in the amount of sialic acid residues linked to ApoCIII. As for the N-glycosylation, no abnormalities were detected in case of the individuals with *NBAS* variants.
